# Supplementary material
Source: MDPI journal article supplement (https://www.mdpi.com/2079-6412/12/5/559)
Supplement: s1 [file s1 › coatings-1670709-supplementary.pdf]

# Supplementary Materials: Preparation of a Heterogeneous Catalyst CuO-Fe<sub>2</sub>O<sub>3</sub>/CTS-ATP and Degradation of Methylene Blue and Ciprofloxacin

Ting Zhang\*, Wenhui Li, Qiyang Guo, Yi Wang and Chunlei Li

School of Petrochemical Engineering, Lanzhou University of Technology, 287 Langongping Road, Lanzhou 730050, China; lwh18298324665@163.com (W.L.); guoqiyang@gmail.com (Q.G.); wangyi@lut.edu.cn (Y.W.); licl@lut.edu.cn (C.L.)

\* Correspondence: zhangting@lut.edu.cn

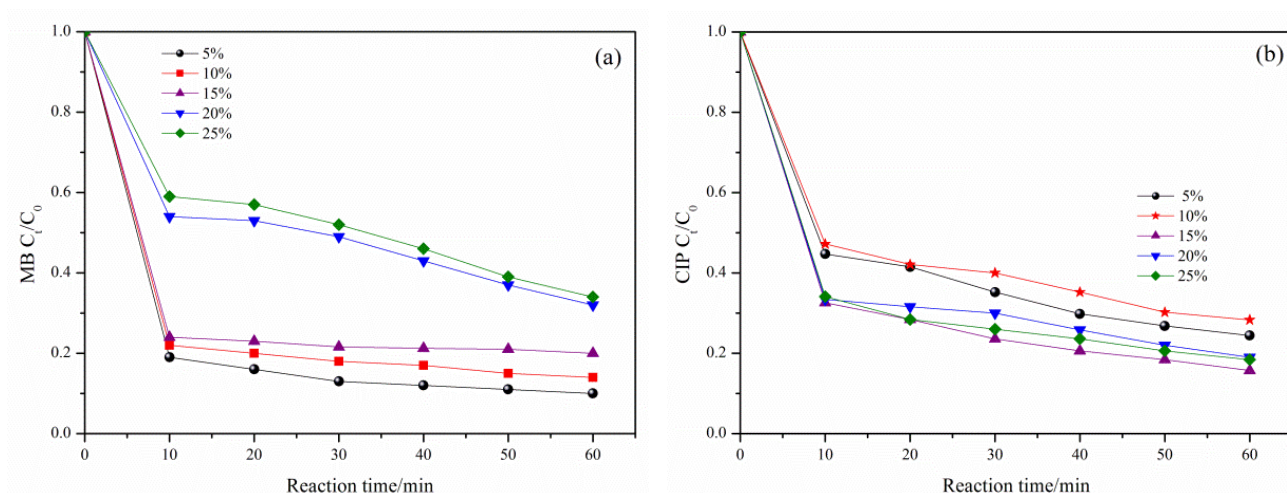

**Figure S1.** Influences of precursor concentration (during catalyst preparation) on MB (a) and CIP (b) removal.

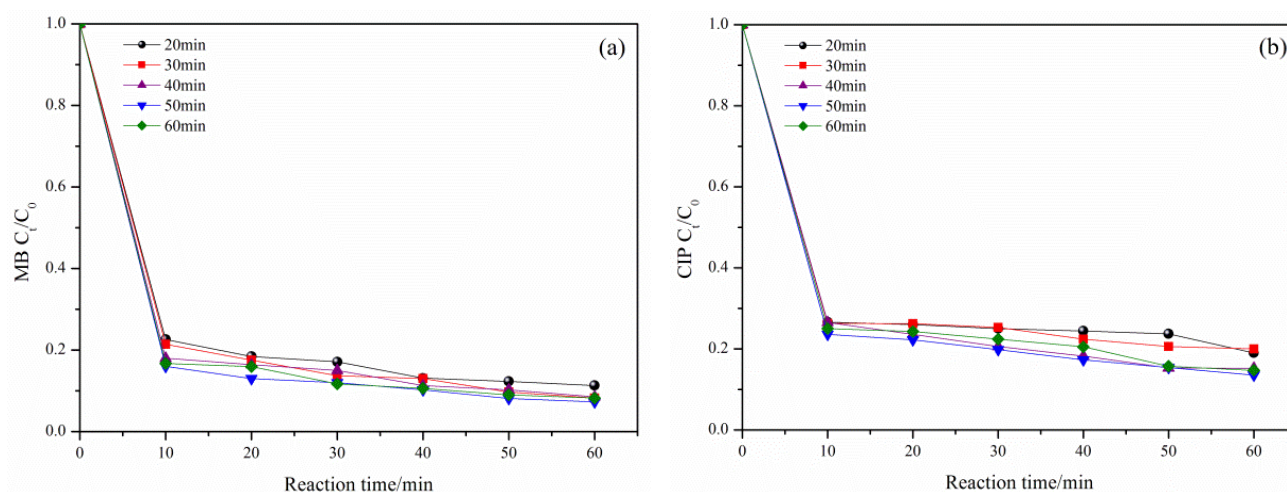

**Figure S2.** Influences of ultrasonic impregnation time (during catalyst preparation) on MB (a) and CIP (b) removal.

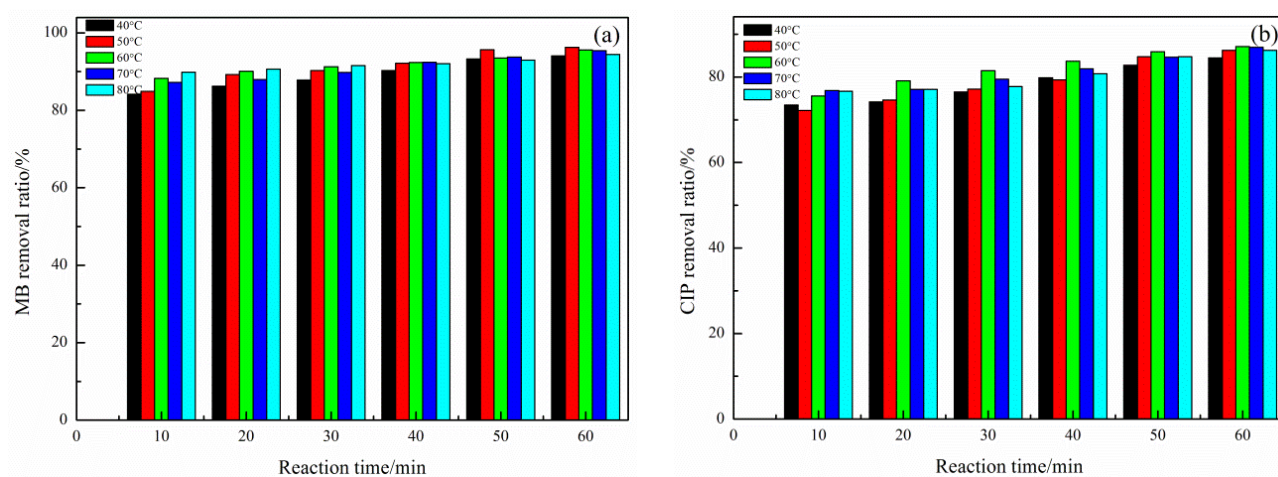

Figure S3. Influences of reaction temperature on MB (a) and CIP (b) removal.

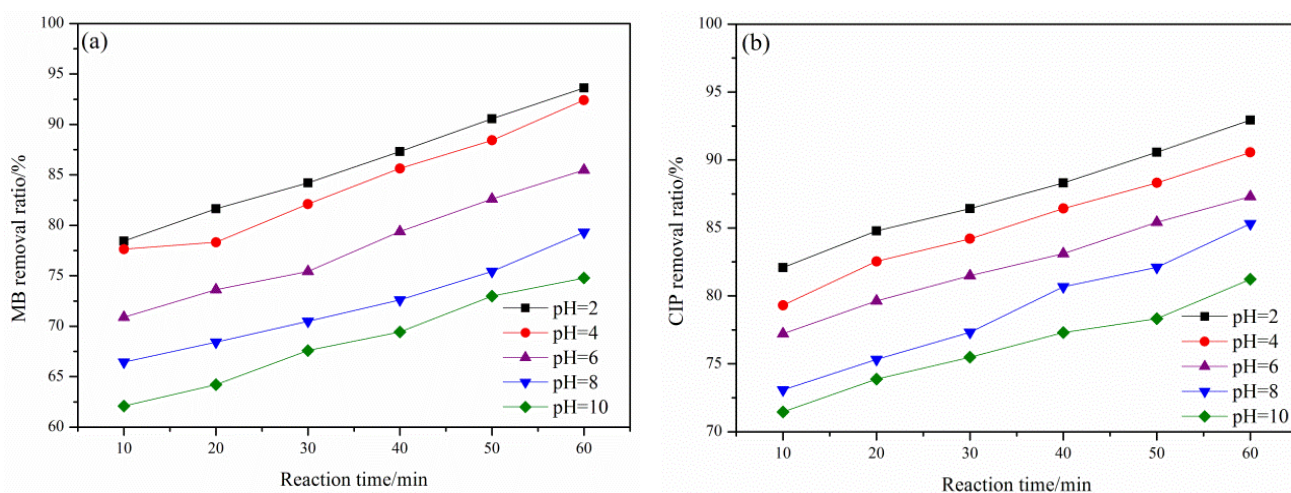

Figure S4. Influences of pH values on MB (a) and CIP (b) removal.

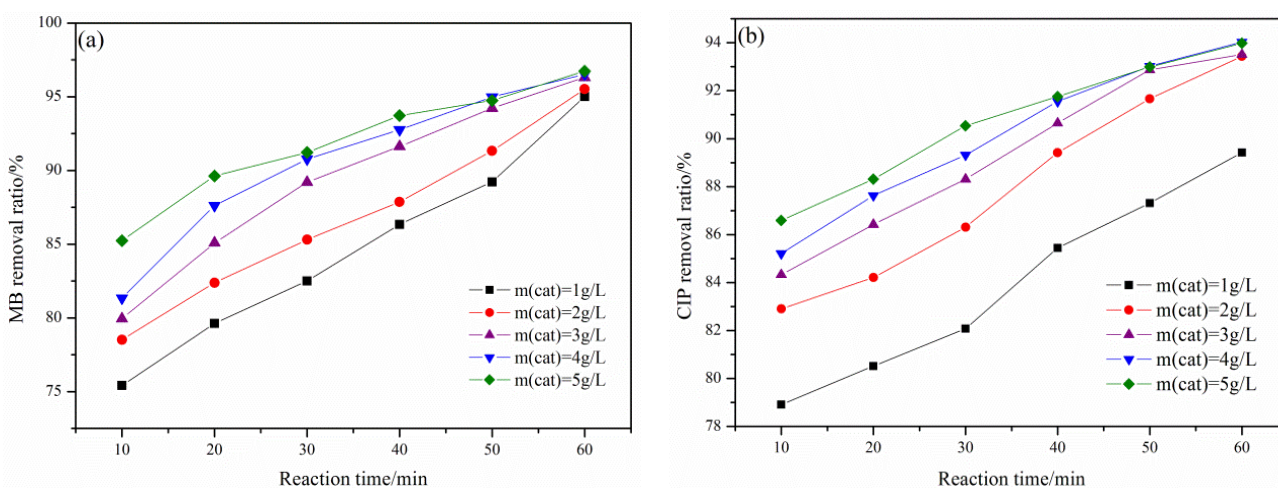

Figure S5. Influences of catalyst dosages on MB (a) and CIP (b) removal.

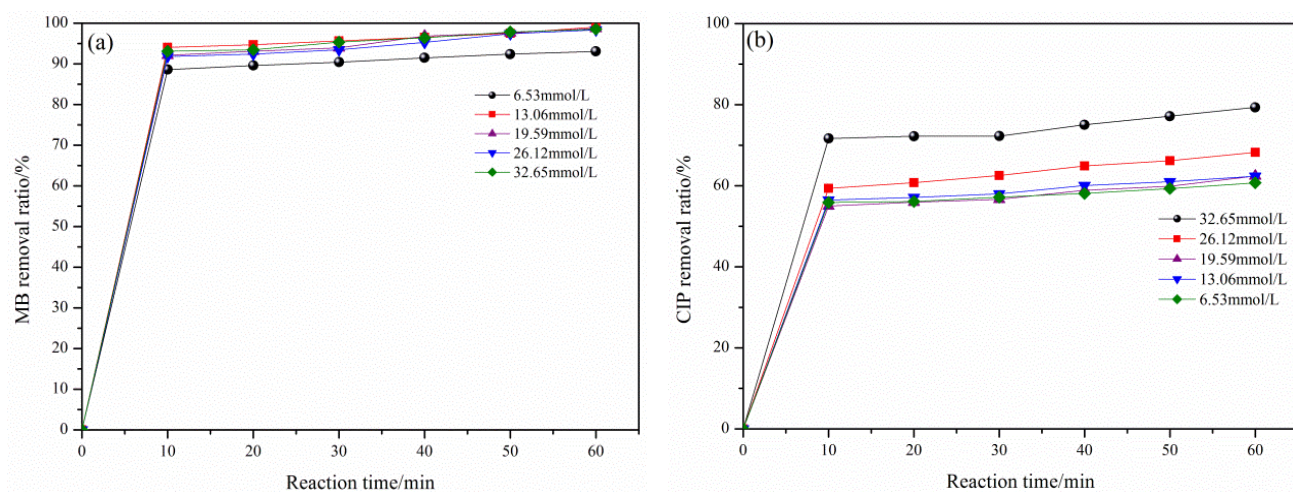

**Figure S6.** Influences of  $\text{H}_2\text{O}_2$  concentrations on MB (a) and CIP (b) removal.

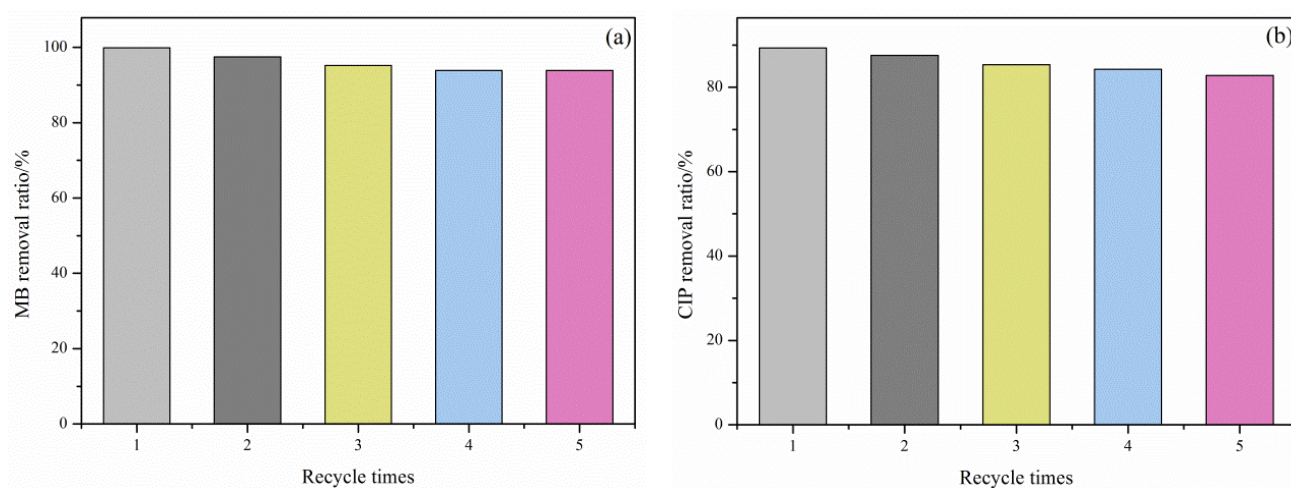

**Figure S7.** Influences of recycle times of prepared catalyst on MB (a) and CIP (b) removal.
